# Supplementary material for: Characterization of Dengue Virus 4 Cases in Paraguay, 2019–2020
Source: MDPI journal article supplement (doi:10.3390/v16020181), 2024-01-25
Supplement: s1 [file s1]

## **Characterization of Dengue Virus 4 Cases in Paraguay, 2019–2020**

### **Supplementary Material**

Alejandra Rojas, John Shen, Fátima Cardozo, Cynthia Bernal, Oliver Caballero, Sara Ping, Autum Key, Ali Haider, Yvalena de Guillén, Patricia Langjahr, Maria Eugenia Acosta, Laura Aria, Laura Mendoza, Malvina Páez, Marta Von-Horoch, Patricia Luraschi, Sandra Cabral, María Cecilia Sánchez, Aurelia Torres, Benjamin A. Pinsky, Anne Piantadosi and Jesse J.

Waggoner

## Supplemental Methods

**Downsampling of DENV-4 sequences.** The following steps were taken to downsample the set of 628 DENV-4 reference sequences from ViPR used in phylogenetic analysis, while maintaining representation across geography and time. Seventeen sequences, excepting sequences from Paraguay, were removed due to low coverage (>10% of the genome contained ambiguous or missing bases). Four sequences were removed because they were collected after the study period. Twenty-eight specimens with identical sequences, year of collection, and country of origin to another specimen were removed. Since the Paraguay DENV-4 sequences were most closely related to genotype II, 365 reference sequences from the other three genotypes (4-I, 4-III, 4-IV sylvatic) were removed based on the ViPR genotyping/subtyping tool (ViPR, 2022). Fourteen sequences were removed because either year or country of collection was missing. Finally, our downsampling scheme restricted sequences to one per year per country for reference samples outside of the Americas, ten per year per country within the Americas but excluding Paraguay, and all Paraguay samples. At the beginning of an exploratory maximum likelihood (ML) analysis, a composition chi-square test was performed by IQ-TREE for every sequence to test for homogeneity of character composition (Trifinopoulos et al., 2016). One sequence, MT040677 (Paraguay, 2018), failed this composition test because it significantly deviated from the mean composition in the alignment and depicted an unusually long branch topology in the resulting tree. Thus, this sequence was considered misclassified and removed.

**Figure S1.** DENV viral load did not differ significantly among individuals with and without detectable (A) NS1 antigen or (B) anti-DENV IgM in the Standard Q Dengue Duo rapid test.

Abbreviations: Pos, Positive; Neg, Negative; Ns, non-significant.

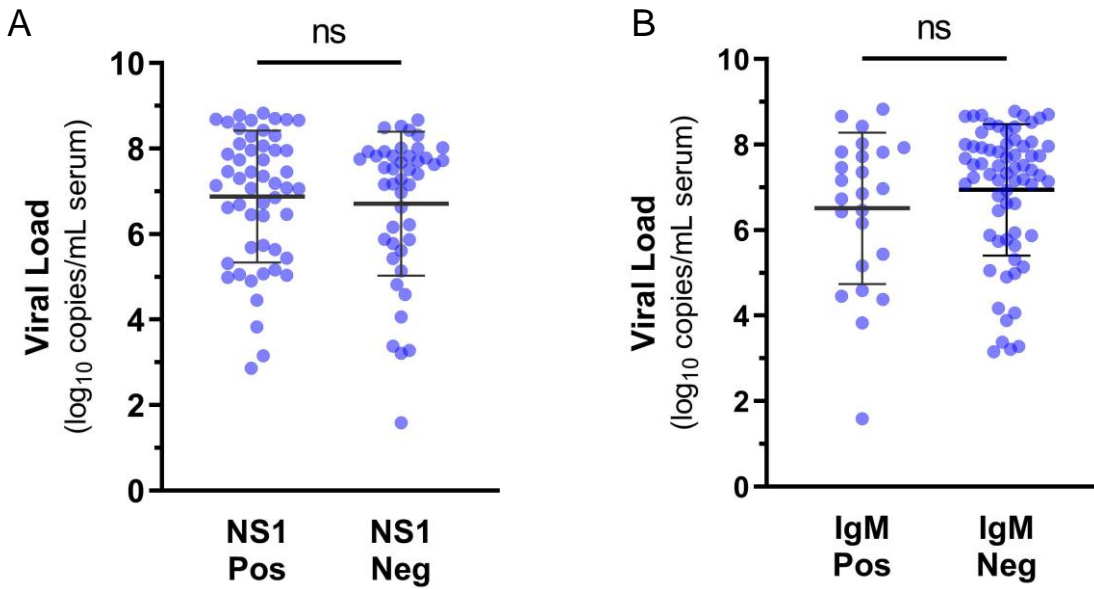

**Figure S2.** NS1 and anti-DENV IgM rapid diagnostic test performance by day post-symptom onset. Dashed lines show average sensitivity across the first seven days post-symptom onset.

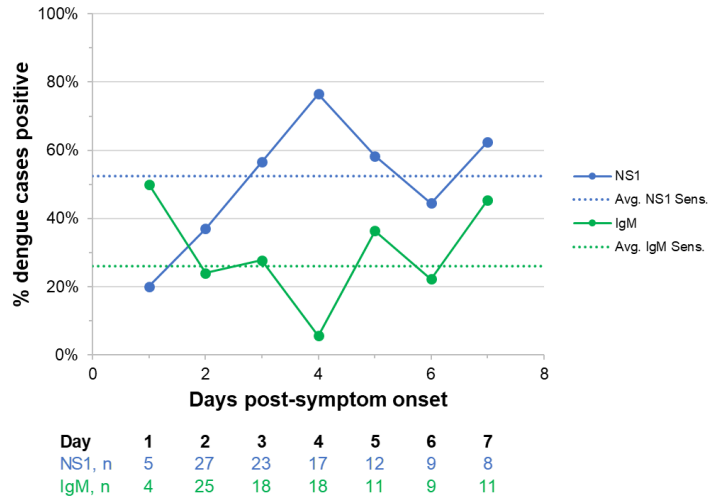

**Figure S3.** Epidemiologic week of symptom onset for 61 sequenced DENV-4 samples.

Alignment of bars, vertical gridlines, and axis labels was made based on Monday weeks. Dates of symptom onset range from 27 February 2019 to 04 March 2020.

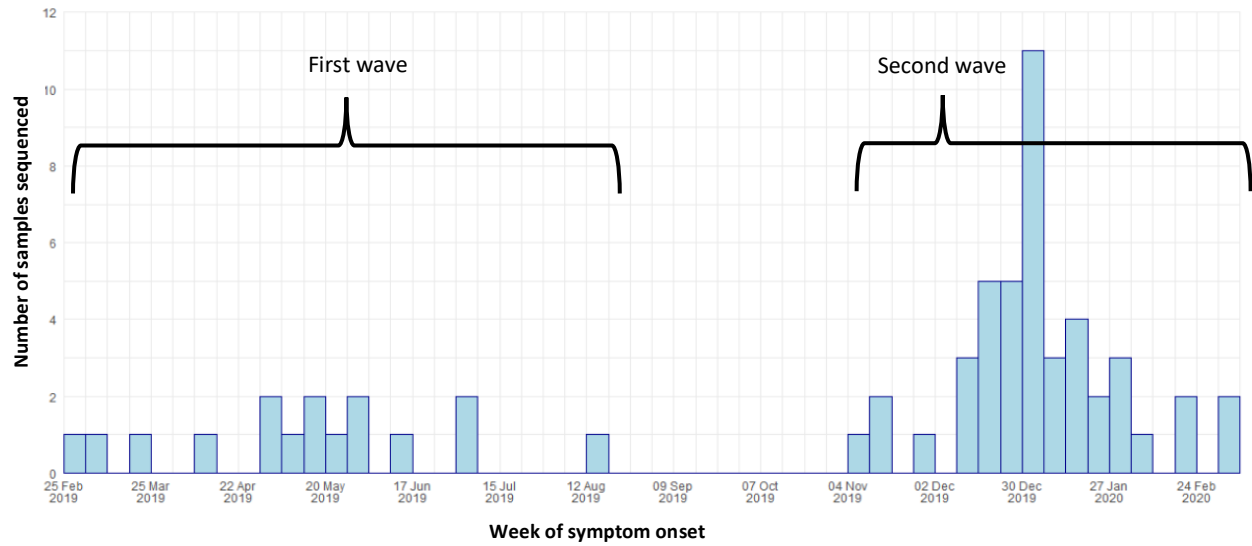

**Figure S4.** ML trees of DENV-4 genotype II. **A)** Full tree with 200 sequences from the final dataset: 61 DENV-4 from Paraguay, 2019-2020 (this study); one DENV-4 sequence from Paraguay, 2018 (this study); 9 reference sequences from Paraguay in 2018; and 129 globally representative DENV-4 sequences. **B)** Magnified and cropped tree to show Paraguay 2019-2020 sequences and closest references.

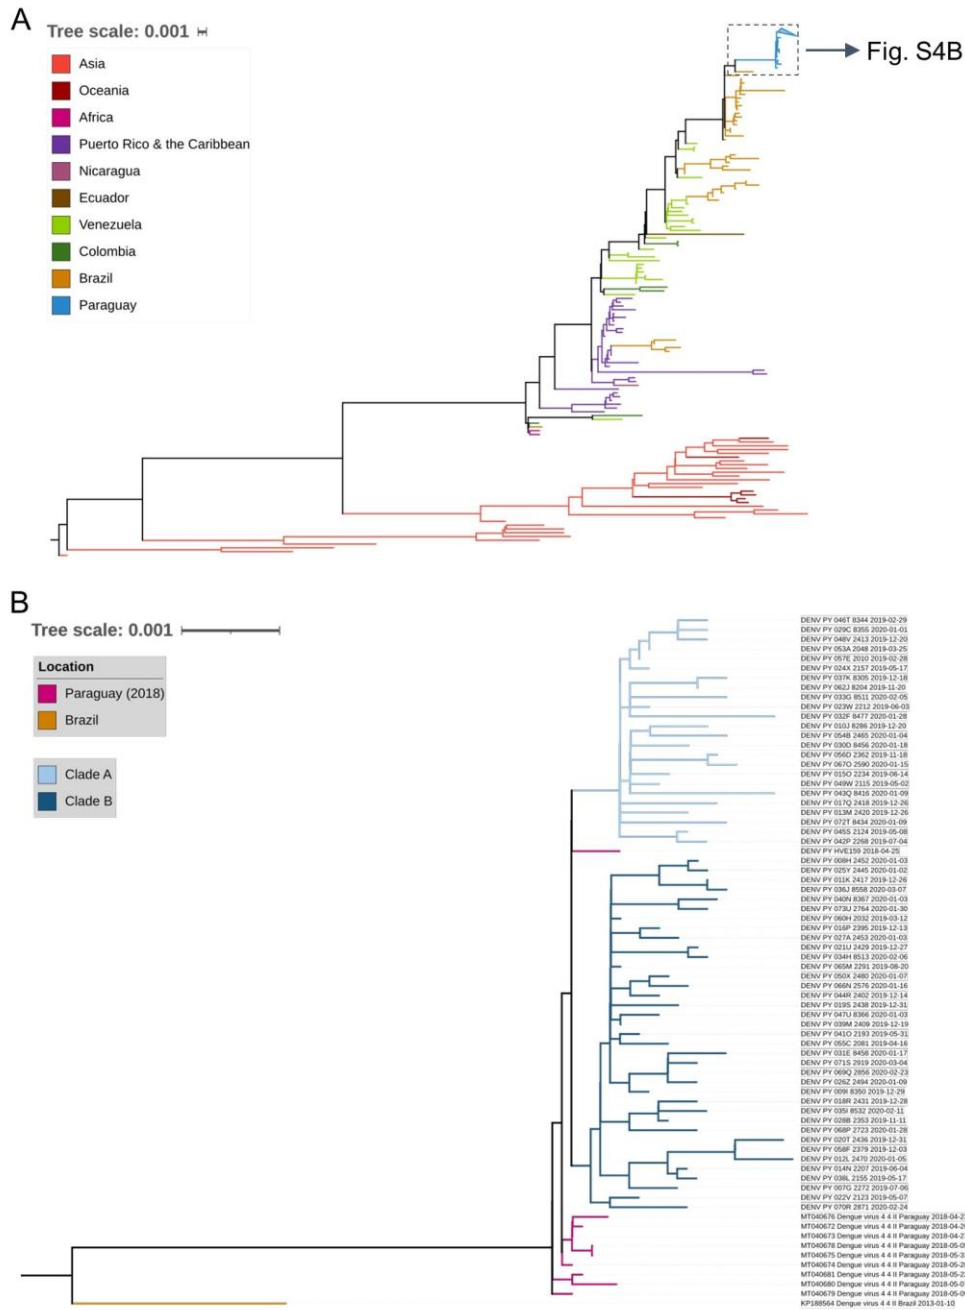

**Table S1.** Department or district of residence of dengue and other acute illness cases.

| Department/District | Dengue cases <sup>a</sup> | Other acute illness cases <sup>a</sup> |
|---------------------|---------------------------|----------------------------------------|
|                     | n=253                     | n=546                                  |
| Alto Paraguay       | 0 (0)                     | 1 (0.2)                                |
| Alto Paraná         | 2 (0.8)                   | 1 (0.2)                                |
| Amambay             | 5 (2.0)                   | 2 (0.4)                                |
| Boquerón            | 2 (0.8)                   | 0 (0)                                  |
| Caaguazú            | 1 (0.4)                   | 2 (0.4)                                |
| Canindeyú           | 0 (0)                     | 6 (1.1)                                |
| Capital (Asunción)  | 56 (22.1)                 | 135 (24.7)                             |
| Central             | 173 (68.4)                | 366 (67.0)                             |
| Concepción          | 2 (0.8)                   | 0 (0)                                  |
| Cordillera          | 1 (0.4)                   | 12 (2.2)                               |
| Guairá              | 0 (0)                     | 3 (0.5)                                |
| Itapúa              | 0 (0)                     | 1 (0.2)                                |
| Paraguarí           | 6 (2.4)                   | 4 (0.7)                                |
| Presidente Hayes    | 2 (0.8)                   | 8 (1.5)                                |
| San Pedro           | 3 (1.2)                   | 5 (0.9)                                |

<sup>a</sup>Presented as n (%).

**Table S2.** Data on DENV-4 samples sequenced in this study.

| NCBI/GenBank<br>Accession number | Collection<br>Date | City                  | Department    | Genome<br>coverage<br>(%) | Average<br>coverage depth | DMPT<br>Ct value | Serum viral<br>load <sup>a</sup> |
|----------------------------------|--------------------|-----------------------|---------------|---------------------------|---------------------------|------------------|----------------------------------|
| OP811915                         | 18-Jan-2020        | Pirayú                | Paraguarí     | 95                        | 12                        | 35.62            | 4.17                             |
| OP811916                         | 14-Dec-2019        | Areguá                | Central       | 100                       | 1,607                     | 24.31            | 7.33                             |
| OP811917                         | 8-May-2019         | Areguá                | Central       | 100                       | 1,403                     | 24.42            | 7.74                             |
| OP811918                         | 29-Dec-2019        | Asunción              | Capital       | 100                       | 3,051                     | 24.67            | 7.33                             |
| OP811919                         | 03-Jan-2020        | San Lorenzo           | Central       | 100                       | 3,621                     | 24.77            | 7.30                             |
| OP811920                         | 6-Jul-2019         | Villeta               | Central       | 100                       | 1.118                     | 24.39            | 7.68                             |
| OP811921                         | 3-Mar-2020         | Asunción              | Capital       | 100                       | 9,042                     | 26.51            | 7.13                             |
| OP811922                         | 29-Dec-2019        | Yaguarón              | Paraguarí     | 100                       | 25                        | 33.99            | 4.82                             |
| OP811923                         | 20-Dec-2019        | Asunción              | Capital       | 100                       | 2,313                     | 23.87            | 7.55                             |
| OP811924                         | 26-Dec-2019        | San Antonio           | Central       | 100                       | 957                       | 24.78            | 7.21                             |
| OP811925                         | 05-Jan-2020        | Ñemby                 | Central       | 100                       | 9,460                     | 27.41            | 6.89                             |
| OP811926                         | 26-Dec-2019        | Lambaré               | Central       | 100                       | 1,574                     | 32.23            | 5.61                             |
| OP811927                         | 4-Jun-2019         | Asunción              | Capital       | 100                       | 1,974                     | 24.13            | 7.74                             |
| OP811928                         | 14-Jun-2019        | Asunción              | Capital       | 100                       | 308                       | 24.47            | 7.40                             |
| OP811929                         | 13-Dec-2019        | Fernando de la Mora   | Central       | 100                       | 68                        | 25.53            | 7.01                             |
| OP811930                         | 26-Dec-2019        | J. Augusto Zaldívar   | Central       | 100                       | 85                        | 25.75            | 6.96                             |
| OP811931                         | 28-Dec-2019        | Capiatá               | Central       | 100                       | 173                       | 32.64            | 5.50                             |
| OP811932                         | 21-Dec-2019        | Limpio                | Central       | 100                       | 4,523                     | 27.15            | 6.96                             |
| OP811933                         | 31-Dec-2019        | San Lorenzo           | Central       | 100                       | 3,649                     | 26.26            | 7.20                             |
| OP811934                         | 27-Dec-2019        | Filadelfia            | Boquerón      | 100                       | 851                       | 25.77            | 7.33                             |
| OP811935                         | 7-May-2019         | Ciudad del Este       | Alto Paraná   | 100                       | 1,104                     | 26.65            | 7.28                             |
| OP811936                         | 3-Jun-2019         | Puerto Casado         | Alto Paraguay | 100                       | 40                        | 33.16            | 5.07                             |
| OP811937                         | 17-May-2019        | Ñemby                 | Central       | 100                       | 6,286                     | 25.08            | 7.51                             |
| OP811938                         | 02-Jan-2020        | Villa Elisa           | Central       | 100                       | 26                        | 25.12            | 7.50                             |
| OP811939                         | 09-Jan-2020        | Asunción              | Capital       | 100                       | 10,478                    | 26.01            | 7.50                             |
| OP811940                         | 03-Jan-2020        | Asunción              | Capital       | 100                       | 3,886                     | 29.00            | 6.62                             |
| OP811941                         | 11-Nov-2019        | Lambaré               | Central       | 100                       | 1,628                     | 27.66            | 6.46                             |
| OP811942                         | 01-Jan-2020        | Mariano Roque Alonso  | Central       | 100                       | 5,759                     | 23.75            | 7.50                             |
| OP811943                         | 17-Jan-2020        | Paraguarí             | Paraguarí     | 100                       | 1,445                     | 30.44            | 5.63                             |
| OP811944                         | 28-Jan-2020        | Asunción              | Capital       | 100                       | 2,575                     | 24.36            | 7.33                             |
| OP811945                         | 5-Feb-2020         | Luque                 | Central       | 100                       | 1,846                     | 24.72            | 7.23                             |
| OP811946                         | 6-Feb-2020         | Mariscal Estigarribia | Boquerón      | 100                       | 6,835                     | 20.51            | 8.41                             |
| OP811947                         | 11-Feb-2020        | Areguá                | Central       | 100                       | 737                       | 26.24            | 6.80                             |
| OP811948                         | 7-Mar-2020         | No data available     | Central       | 100                       | 2,685                     | 25.30            | 7.07                             |
| OP811949                         | 18-Dec-2019        | Itaguá                | Central       | 100                       | 14,101                    | 19.44            | 8.75                             |
| OP811950                         | 17-May-2019        | Asunción              | Capital       | 100                       | 9,204                     | 20.29            | 8.66                             |
| OP811951                         | 19-Dec-2019        | San Lorenzo           | Central       | 100                       | 6,595                     | 20.69            | 8.28                             |
| OP811952                         | 03-Jan-2020        | Capiatá               | Central       | 100                       | 12,243                    | 22.58            | 7.90                             |
| OP811953                         | 31-May-2019        | Luque                 | Central       | 100                       | 6,268                     | 23.36            | 7.93                             |



|          |             |                      |         |     |        |       |      |
|----------|-------------|----------------------|---------|-----|--------|-------|------|
| OP811954 | 4-Jul-2019  | Mariano Roque Alonso | Central | 100 | 4,574  | 24.18 | 7.75 |
| OP811955 | 09-Jan-2020 | Luque                | Central | 100 | 2,233  | 24.26 | 7.78 |
| OP811956 | 20-Dec-2019 | Ñemby                | Central | 100 | 623    | 24.90 | 7.18 |
| OP811957 | 2-May-2019  | Capiatá              | Central | 100 | 1,672  | 25.37 | 7.53 |
| OP811958 | 07-Jan-2020 | Asunción             | Capital | 100 | 3,954  | 26.25 | 7.36 |
| OP811959 | 25-Mar-2019 | Villa Elisa          | Central | 100 | 1,684  | 23.52 | 7.95 |
| OP811960 | 04-Jan-2020 | Asunción             | Capital | 100 | 13,705 | 23.63 | 7.90 |
| OP811961 | 16-Apr-2019 | Limpio               | Central | 100 | 3,508  | 24.05 | 7.83 |
| OP811962 | 18-Nov-2019 | Asunción             | Capital | 100 | 1,919  | 24.44 | 7.30 |
| OP811963 | 28-Feb-2019 | Luque                | Central | 100 | 1,725  | 24.75 | 7.67 |
| OP811964 | 03-Dec-2019 | Ñemby                | Central | 100 | 692    | 25.87 | 6.98 |
| OP811965 | 12-Mar-2019 | Capiatá              | Central | 100 | 1,532  | 26.24 | 7.32 |
| OP811966 | 20-Nov-2019 | Itaguá               | Central | 100 | 96     | 30.06 | 5.87 |
| OP811967 | 20-Aug-2019 | San Lorenzo          | Central | 100 | 232    | 28.36 | 6.73 |
| OP811968 | 16-Jan-2020 | Areguá               | Central | 100 | 392    | 27.90 | 6.50 |
| OP811969 | 15-Jan-2020 | Capiatá              | Central | 100 | 2,329  | 25.49 | 7.16 |
| OP811970 | 28-Jan-2020 | Asunción             | Capital | 100 | 722    | 28.36 | 6.38 |
| OP811971 | 23-Feb-2020 | Guarambaré           | Central | 100 | 8,524  | 25.61 | 7.13 |
| OP811972 | 24-Feb-2020 | San Lorenzo          | Central | 100 | 785    | 28.51 | 6.27 |
| OP811973 | 4-Mar-2020  | Loma Pyta            | Central | 100 | 3,406  | 25.43 | 7.18 |
| OP811974 | 09-Jan-2020 | Ñemby                | Central | 100 | 1,141  | 27.25 | 6.61 |
| OP811975 | 30-Jan-2020 | Asunción             | Capital | 100 | 1,016  | 28.50 | 6.27 |
| OP811976 | 25-Apr-2018 | Lambaré              | Central | 100 | 120    | 33.38 | 5.51 |
| -        | -           | -                    | -       | 15  | -      | 38.16 | 3.38 |

<sup>a</sup> Expressed as log<sub>10</sub> copies/mL of serum

<sup>b</sup> Eliminated from sequence analyses due to insufficient genome coverage

**Table S3.** Demographic data on 61 participants from whom DENV-4 whole genome sequences were obtained.

| <b>Characteristic</b> | <b>Overall</b> | <b>DWS-/DWS+</b> | <b>Severe dengue</b> |
|-----------------------|----------------|------------------|----------------------|
|                       | n=61           | n=53             | n=8                  |
| Age, years, mean (SD) | 39.2 (20.4)    | 35.9 (19.2)      | 60.9 (15.0)          |
| Gender, female, n (%) | 40 (65.6)      | 36 (67.9)        | 4 (50.0)             |

Abbreviations: DWS-, dengue without warning signs; DWS+, dengue with warning signs; SD, standard deviation.

**Table S4.** Sequences retrieved from NCBI GenBank included for the phylogenetic analysis.

| NCBI/GenBank<br>Accession number | Sequence ID                                    | Country/<br>Location | Date of<br>collection |
|----------------------------------|------------------------------------------------|----------------------|-----------------------|
| JN559740                         | JN559740 Dengue_virus_4 4_II Brazil 1982-03-26 | Brazil               | 1982-03-26            |
| JQ513334                         | JQ513334 Dengue_virus_4 4_II Brazil 2010-11-10 | Brazil               | 2010-11-10            |
| JQ513335                         | JQ513335 Dengue_virus_4 4_II Brazil 2011-01-12 | Brazil               | 2011-01-12            |
| JQ513336                         | JQ513336 Dengue_virus_4 4_II Brazil 2011-01-11 | Brazil               | 2011-01-11            |
| JQ513337                         | JQ513337 Dengue_virus_4 4_II Brazil 2011-01-20 | Brazil               | 2011-01-20            |
| KJ596665                         | KJ596665 Dengue_virus_4 4_II Brazil 2012-03-20 | Brazil               | 2012-03-20            |
| KJ579246                         | KJ579246 Dengue_virus_4 4_II Brazil 2012-04-19 | Brazil               | 2012-04-19            |
| KJ596659                         | KJ596659 Dengue_virus_4 4_II Brazil 2012-03-30 | Brazil               | 2012-03-30            |
| KJ579242                         | KJ579242 Dengue_virus_4 4_II Brazil 2012-04-18 | Brazil               | 2012-04-18            |
| JN983813                         | JN983813 Dengue_virus_4 4_II Brazil 2010-09-08 | Brazil               | 2010-09-08            |
| MK514144                         | MK514144 Dengue_virus_4 4_II Haiti 2015-01-28  | Brazil               | 2015-01-28            |
| JN559741                         | JN559741 Dengue_virus_4 4_II Brazil 2010-07-21 | Brazil               | 2010-07-21            |
| KJ596674                         | KJ596674 Dengue_virus_4 4_II Brazil 2012-02-16 | Brazil               | 2012-02-16            |
| KJ579245                         | KJ579245 Dengue_virus_4 4_II Brazil 2012-03-30 | Brazil               | 2012-03-30            |
| KJ579248                         | KJ579248 Dengue_virus_4 4_II Brazil 2012-04-19 | Brazil               | 2012-04-19            |
| KJ579247                         | KJ579247 Dengue_virus_4 4_II Brazil 2012-04-12 | Brazil               | 2012-04-12            |
| KU513441                         | KU513441 Dengue_virus_4 4_II Brazil 2013-07-02 | Brazil               | 2013-07-02            |
| KP188562                         | KP188562 Dengue_virus_4 4_II Brazil 2012-12-10 | Brazil               | 2012-12-10            |
| KP188566                         | KP188566 Dengue_virus_4 4_II Brazil 2013-02-08 | Brazil               | 2013-02-08            |
| KP188563                         | KP188563 Dengue_virus_4 4_II Brazil 2013-01-07 | Brazil               | 2013-01-07            |
| KT794007                         | KT794007 Dengue_virus_4 4_II Brazil 2011-03-07 | Brazil               | 2011-03-07            |
| KP188561                         | KP188561 Dengue_virus_4 4_II Brazil 2012-07-11 | Brazil               | 2012-07-11            |
| KP188564                         | KP188564 Dengue_virus_4 4_II Brazil 2013-01-10 | Brazil               | 2013-01-10            |
| JQ513330                         | JQ513330 Dengue_virus_4 4_II Brazil 2010-07-17 | Brazil               | 2010-07-17            |
| JQ513331                         | JQ513331 Dengue_virus_4 4_II Brazil 2010-07-18 | Brazil               | 2010-07-18            |
| JQ513332                         | JQ513332 Dengue_virus_4 4_II Brazil 2010-08-20 | Brazil               | 2010-08-20            |
| JQ513333                         | JQ513333 Dengue_virus_4 4_II Brazil 2010-08-24 | Brazil               | 2010-08-24            |

|          |                                                          |                  |            |
|----------|----------------------------------------------------------|------------------|------------|
| JQ513341 | JQ513341 Dengue_virus_4 4_II Brazil 2010-11-21           | Brazil           | 2010-11-21 |
| JQ513340 | JQ513340 Dengue_virus_4 4_II Brazil 2010-11-29           | Brazil           | 2010-11-29 |
| JQ513338 | JQ513338 Dengue_virus_4 4_II Brazil 2011-01-14           | Brazil           | 2011-01-14 |
| JQ513339 | JQ513339 Dengue_virus_4 4_II Brazil 2011-01-24           | Brazil           | 2011-01-24 |
| JQ513342 | JQ513342 Dengue_virus_4 4_II Brazil 2011-01-29           | Brazil           | 2011-01-29 |
| JQ513343 | JQ513343 Dengue_virus_4 4_II Brazil 2011-01-29           | Brazil           | 2011-01-29 |
| JQ513344 | JQ513344 Dengue_virus_4 4_II Brazil 2011-01-13           | Brazil           | 2011-01-13 |
| KP188565 | KP188565 Dengue_virus_4 4_II Brazil 2013-01-30           | Brazil           | 2013-01-30 |
| FJ196850 | FJ196850 Dengue_virus_4 NA China 1990-07-02              | China            | 1990-07-02 |
| MN018390 | MN018390 Dengue_virus_4 NA China 2013-08-12              | China            | 2013-08-12 |
| KC333651 | KC333651 Dengue_virus_4 4_II China 2012-07-02            | China            | 2012-07-02 |
| JF741967 | JF741967 Dengue_virus_4 4_II China 2010-09-26            | China            | 2010-09-26 |
| GU289913 | GU289913 Dengue_virus_4 4_II Colombia 1982-07-02         | Colombia         | 1982-07-02 |
| GQ868583 | GQ868583 Dengue_virus_4 4_II Colombia 2004-07-02         | Colombia         | 2004-07-02 |
| GQ868584 | GQ868584 Dengue_virus_4 4_II Colombia 2004-07-02         | Colombia         | 2004-07-02 |
| GQ868585 | GQ868585 Dengue_virus_4 4_II Colombia 2005-07-02         | Colombia         | 2005-07-02 |
| GQ868579 | GQ868579 Dengue_virus_4 4_II Colombia 2001-07-02         | Colombia         | 2001-07-02 |
| GQ868580 | GQ868580 Dengue_virus_4 4_II Colombia 2001-07-02         | Colombia         | 2001-07-02 |
| FJ024476 | FJ024476 Dengue_virus_4 4_II Colombia 1997-07-02         | Colombia         | 1997-07-02 |
| MW945720 | MW945720 Dengue_virus_4 4_II Dominica 1981-07-02         | Dominica         | 1981-07-02 |
| KY474335 | KY474335 Dengue_virus_4 4_II Ecuador 2014-07-02          | Ecuador          | 2014-07-02 |
| JQ915084 | JQ915084 Dengue_virus_4 4_II French_Polynesia 2010-06-15 | French Polynesia | 2010-06-15 |
| JQ915081 | JQ915081 Dengue_virus_4 4_II French_Polynesia 2009-01-29 | French Polynesia | 2009-01-29 |
| JF262782 | JF262782 Dengue_virus_4 4_II Haiti 1994-07-02            | Haití            | 1994-07-02 |
| KT276273 | KT276273 Dengue_virus_4 4_II Haiti 2014-09-08            | Haití            | 2014-09-08 |
| KP140942 | KP140942 Dengue_virus_4 4_II Haiti 2014-09-11            | Haití            | 2014-09-11 |
| JQ922560 | JQ922560 Dengue_virus_4 4 India 2009-07-02               | India            | 2009-07-02 |
| KX845005 | KX845005 Dengue_virus_4 4 India 2015-07-02               | India            | 2015-07-02 |
| KU509287 | KU509287 Dengue_virus_4 4 India 2009-07-02               | India            | 2009-07-02 |
| KC762696 | KC762696 Dengue_virus_4 4_II Indonesia 2007-08-13        | Indonesia        | 2007-08-13 |
| KC762698 | KC762698 Dengue_virus_4 4_II Indonesia 2008-04-30        | Indonesia        | 2008-04-30 |

|          |                                                          |                  |            |
|----------|----------------------------------------------------------|------------------|------------|
| KU523872 | KU523872 Dengue_virus_4 4_II Indonesia 2015-04-08        | Indonesia        | 2015-04-08 |
| KC762697 | KC762697 Dengue_virus_4 4_II Indonesia 2007-12-11        | Indonesia        | 2007-12-11 |
| KU509288 | KU509288 Dengue_virus_4 4_II Indonesia 2010-07-02        | Indonesia        | 2010-07-02 |
| MW945636 | MW945636 Dengue_virus_4 4_II Indonesia 1973-07-02        | Indonesia        | 1973-07-02 |
| MH823210 | MH823210 Dengue_virus_4 4_II Indonesia 2014-07-02        | Indonesia        | 2014-07-02 |
| LC069810 | LC069810 Dengue_virus_4 4_II Japan 2015-07-02            | Japan            | 2015-07-02 |
| MH888334 | MH888334 Dengue_virus_4 4_II Malaysia 2013-01-04         | Malaysia         | 2013-01-04 |
| MH051734 | MH051734 Dengue_virus_4 4_II Malaysia 2014-12-15         | Malaysia         | 2014-12-15 |
| JQ915085 | JQ915085 Dengue_virus_4 4_II New_Caledonia 2008-02-20    | New Caledonia    | 2008-02-20 |
| JQ915086 | JQ915086 Dengue_virus_4 4_II New_Caledonia 2009-02-05    | New Caledonia    | 2009-02-05 |
| MW881266 | MW881266 Dengue_virus_4 4_II Nicaragua 1999-07-02        | Nicaragua        | 1999-07-02 |
| KF041260 | KF041260 Dengue_virus_4 4 Pakistan 2009-07-02            | Pakistan         | 2009-07-02 |
| MH382789 | MH382789 Dengue_virus_4 4_II Papua_New_Guinea 2016-07-02 | Papua New Guinea | 2016-07-02 |
| MT040676 | MT040676 Dengue_virus_4 4_II Paraguay 2018-04-23         | Paraguay         | 2018-04-23 |
| MT040672 | MT040672 Dengue_virus_4 4_II Paraguay 2018-04-26         | Paraguay         | 2018-04-26 |
| MT040673 | MT040673 Dengue_virus_4 4_II Paraguay 2018-04-27         | Paraguay         | 2018-04-27 |
| MT040674 | MT040674 Dengue_virus_4 4_II Paraguay 2018-05-28         | Paraguay         | 2018-05-28 |
| MT040678 | MT040678 Dengue_virus_4 4_II Paraguay 2018-05-05         | Paraguay         | 2018-05-05 |
| MT040675 | MT040675 Dengue_virus_4 4_II Paraguay 2018-05-31         | Paraguay         | 2018-05-31 |
| MT040679 | MT040679 Dengue_virus_4 4_II Paraguay 2018-05-09         | Paraguay         | 2018-05-09 |
| MT040681 | MT040681 Dengue_virus_4 4_II Paraguay 2018-05-22         | Paraguay         | 2018-05-22 |
| MT040680 | MT040680 Dengue_virus_4 4_II Paraguay 2018-05-07         | Paraguay         | 2018-05-07 |
| KY670635 | KY670635 Dengue_virus_4 NA Philippines 2003-10-15        | Philippines      | 2003-10-15 |
| KR011349 | KR011349 Dengue_virus_4 4 Philippines 1956-08-28         | Philippines      | 1956-08-28 |
| KU523871 | KU523871 Dengue_virus_4 4_II Philippines 2014-02-13      | Philippines      | 2014-02-13 |
| FJ226067 | FJ226067 Dengue_virus_4 4_III Puerto Rico 1994-07-02     | Puerto Rico      | 1994-07-02 |
| GQ199879 | GQ199879 Dengue_virus_4 4_II Puerto Rico 1994-07-02      | Puerto Rico      | 1994-07-02 |
| GQ199880 | GQ199880 Dengue_virus_4 4_II Puerto Rico 1995-07-02      | Puerto Rico      | 1995-07-02 |
| FJ810417 | FJ810417 Dengue_virus_4 4_II Puerto Rico 1995-07-02      | Puerto Rico      | 1995-07-02 |
| GQ252675 | GQ252675 Dengue_virus_4 4_II Puerto Rico 1995-07-02      | Puerto Rico      | 1995-07-02 |
| FJ850057 | FJ850057 Dengue_virus_4 4_II Puerto Rico 1995-07-02      | Puerto Rico      | 1995-07-02 |

|          |                                                     |             |            |
|----------|-----------------------------------------------------|-------------|------------|
| EU854296 | EU854296 Dengue_virus_4 4_II Puerto Rico 1998-07-02 | Puerto Rico | 1998-07-02 |
| FJ850059 | FJ850059 Dengue_virus_4 4_II Puerto Rico 1998-07-02 | Puerto Rico | 1998-07-02 |
| MW945437 | MW945437 Dengue_virus_4 4_II Puerto Rico 1999-07-02 | Puerto Rico | 1999-07-02 |
| FJ882600 | FJ882600 Dengue_virus_4 4_II Puerto Rico 1999-07-02 | Puerto Rico | 1999-07-02 |
| MW945436 | MW945436 Dengue_virus_4 4_II Puerto Rico 1998-07-02 | Puerto Rico | 1998-07-02 |
| GQ199885 | GQ199885 Dengue_virus_4 4_II Puerto Rico 1996-07-02 | Puerto Rico | 1996-07-02 |
| FJ850058 | FJ850058 Dengue_virus_4 4_II Puerto Rico 1996-07-02 | Puerto Rico | 1996-07-02 |
| FJ882598 | FJ882598 Dengue_virus_4 4_II Puerto Rico 1998-07-02 | Puerto Rico | 1998-07-02 |
| FJ882597 | FJ882597 Dengue_virus_4 4_II Puerto Rico 1998-07-02 | Puerto Rico | 1998-07-02 |
| GQ199878 | GQ199878 Dengue_virus_4 4_II Puerto Rico 1994-07-02 | Puerto Rico | 1994-07-02 |
| GQ199881 | GQ199881 Dengue_virus_4 4_II Puerto Rico 1996-07-02 | Puerto Rico | 1996-07-02 |
| GQ199883 | GQ199883 Dengue_virus_4 4_II Puerto Rico 1996-07-02 | Puerto Rico | 1996-07-02 |
| GQ199884 | GQ199884 Dengue_virus_4 4_II Puerto Rico 1996-07-02 | Puerto Rico | 1996-07-02 |
| GQ199882 | GQ199882 Dengue_virus_4 4_II Puerto Rico 1996-07-02 | Puerto Rico | 1996-07-02 |
| FJ882595 | FJ882595 Dengue_virus_4 4_II Puerto Rico 1998-07-02 | Puerto Rico | 1998-07-02 |
| FJ882596 | FJ882596 Dengue_virus_4 4_II Puerto Rico 1998-07-02 | Puerto Rico | 1998-07-02 |
| FJ882601 | FJ882601 Dengue_virus_4 4_II Puerto Rico 1999-07-02 | Puerto Rico | 1999-07-02 |
| MF004387 | MF004387 Dengue_virus_4 4_II Senegal 1981-07-02     | Senegal     | 1981-07-02 |
| GQ398256 | GQ398256 Dengue_virus_4 4_II Singapore 2005-07-02   | Singapore   | 2005-07-02 |
| KY921909 | KY921909 Dengue_virus_4 4_II Singapore 2016-03-15   | Singapore   | 2016-03-15 |
| JX024758 | JX024758 Dengue_virus_4 4_II Singapore 2010-12-15   | Singapore   | 2010-12-15 |
| AY618991 | AY618991 Dengue_virus_4 4 Thailand 1977-07-02       | Thailand    | 1977-07-02 |
| AY618993 | AY618993 Dengue_virus_4 4_II Thailand 2000-07-02    | Thailand    | 2000-07-02 |
| FJ639736 | FJ639736 Dengue_virus_4 4_II Venezuela 1998-07-02   | Venezuela   | 1998-07-02 |
| FJ639744 | FJ639744 Dengue_virus_4 4_II Venezuela 1999-07-02   | Venezuela   | 1999-07-02 |
| FJ639739 | FJ639739 Dengue_virus_4 4_II Venezuela 1998-07-02   | Venezuela   | 1998-07-02 |
| FJ639742 | FJ639742 Dengue_virus_4 4_II Venezuela 1999-07-02   | Venezuela   | 1999-07-02 |
| FJ639745 | FJ639745 Dengue_virus_4 4_II Venezuela 1999-07-02   | Venezuela   | 1999-07-02 |
| FJ639748 | FJ639748 Dengue_virus_4 4_II Venezuela 2000-07-02   | Venezuela   | 2000-07-02 |
| FJ639738 | FJ639738 Dengue_virus_4 4_II Venezuela 1998-07-02   | Venezuela   | 1998-07-02 |
| FJ639764 | FJ639764 Dengue_virus_4 4_II Venezuela 2001-07-02   | Venezuela   | 2001-07-02 |

|          |                                                           |                   |            |
|----------|-----------------------------------------------------------|-------------------|------------|
| FJ639737 | FJ639737 Dengue_virus_4 4_II Venezuela 1998-07-02         | Venezuela         | 1998-07-02 |
| GQ868642 | GQ868642 Dengue_virus_4 4_II Venezuela 2007-07-02         | Venezuela         | 2007-07-02 |
| EU854299 | EU854299 Dengue_virus_4 4_II Venezuela 2007-07-02         | Venezuela         | 2007-07-02 |
| FJ882586 | FJ882586 Dengue_virus_4 4_II Venezuela 2007-07-02         | Venezuela         | 2007-07-02 |
| FJ182016 | FJ182016 Dengue_virus_4 4_II Venezuela 2007-07-02         | Venezuela         | 2007-07-02 |
| FJ882584 | FJ882584 Dengue_virus_4 4_II Venezuela 2007-07-02         | Venezuela         | 2007-07-02 |
| JN819406 | JN819406 Dengue_virus_4 4_II Venezuela 2006-07-02         | Venezuela         | 2006-07-02 |
| HQ332172 | HQ332172 Dengue_virus_4 4_II Venezuela 2007-07-02         | Venezuela         | 2007-07-02 |
| HQ332176 | HQ332176 Dengue_virus_4 4_II Venezuela 2007-07-02         | Venezuela         | 2007-07-02 |
| FJ882585 | FJ882585 Dengue_virus_4 4_II Venezuela 2007-07-02         | Venezuela         | 2007-07-02 |
| EU854301 | EU854301 Dengue_virus_4 4_II Venezuela 2007-07-02         | Venezuela         | 2007-07-02 |
| FJ882592 | FJ882592 Dengue_virus_4 4_II Venezuela 2008-07-02         | Venezuela         | 2008-07-02 |
| FJ882588 | FJ882588 Dengue_virus_4 4_II Venezuela 2007-07-02         | Venezuela         | 2007-07-02 |
| FJ850095 | FJ850095 Dengue_virus_4 4_II Venezuela 2000-07-02         | Venezuela         | 2000-07-02 |
| FJ639773 | FJ639773 Dengue_virus_4 4_II Venezuela 2001-07-02         | Venezuela         | 2001-07-02 |
| JN819409 | JN819409 Dengue_virus_4 4_II Venezuela 1998-07-02         | Venezuela         | 1998-07-02 |
| JF262781 | JF262781 Dengue_virus_4 4_II Venezuela 1995-07-02         | Venezuela         | 1995-07-02 |
| JQ915090 | JQ915090 Dengue_virus_4 4_II Wallis_and_Futuna 2009-04-01 | Wallis and Futuna | 2009-04-01 |

---
